# Supplementary material for: Risk of death by suicide following self-harm presentations to healthcare: development and validation of a multivariable clinical prediction rule (OxSATS)
Source: PubMed Central journal article supplement (PMC10335583; doi:10.1136/bmjment-2023-300673), 2023-05-23
Supplement: bmjment-2023-300673supp001.pdf [file bmjment-2023-300673supp001.pdf]

Supplementary Table 1: Variable definitions

|                                                                         |                                                                                                                                                                                                                                    |
|-------------------------------------------------------------------------|------------------------------------------------------------------------------------------------------------------------------------------------------------------------------------------------------------------------------------|
| <b>Outcome definition</b>                                               |                                                                                                                                                                                                                                    |
| Death from suicide                                                      | Death within 12 months and within 6 months of index self-harm event; ICD-10: X60-X84 (intentional self-harm) or Y10-Y33 (events of undetermined intent)                                                                            |
| <b>General demographics</b>                                             |                                                                                                                                                                                                                                    |
| Age*                                                                    | In years, at time of index date; individuals less than 10 years excluded                                                                                                                                                           |
| Sex*                                                                    | Coded as male or female                                                                                                                                                                                                            |
| <b>Substance misuse</b>                                                 |                                                                                                                                                                                                                                    |
| Current or lifetime alcohol use disorder, excluding acute intoxication* | Any of the following ICD codes at any time at or before index date (acute intoxication (F10.0) excluded)<br>ICD-10 codes: F10.1-F10.6<br>ICD-9: 291, 303.9, 305.0 (nondependent alcohol)<br>ICD-8: 291, 303.0, 303.1, 303.2, 303.9 |
| Current or lifetime drug use disorder*                                  | Any of the following ICD codes, at any time at or before index date<br>ICD-10 codes: F11-F16, F18-19 (subdivisions .1-.7)<br>ICD-9: 292, 304, 305.2-305.9 (nondependent drug use)<br>ICD-8: 304                                    |
| Alcohol intoxication at index                                           | At time of index date, ICD-10: F10.0                                                                                                                                                                                               |
| <b>Living status</b>                                                    |                                                                                                                                                                                                                                    |
| Living with adult                                                       | Obtained from LISA register, which classifies adults as 16 and older                                                                                                                                                               |
| Living with adult                                                       | Living with at least one other individual aged 16+ years. All individuals under 16 years old with missing living status were reclassified as 'living with adult'                                                                   |
| Living with children                                                    | Living with at least one individual under 16 years old                                                                                                                                                                             |
| <b>Treatment in the past three months</b>                               |                                                                                                                                                                                                                                    |
| Any psychotropic medication                                             | Dispensed in the three months prior to index date                                                                                                                                                                                  |
| Any psychotropic medication                                             | Any prescription of antidepressant, antipsychotic or mood stabiliser medication (defined as below)                                                                                                                                 |
| Antidepressant treatment                                                | ATC: N06A                                                                                                                                                                                                                          |
| Antipsychotic treatment                                                 | ATC: N05A, excluding N05AN01, N05AH02                                                                                                                                                                                              |
| Mood stabilizer treatment                                               | ATC: N03AG01, N03AX09, N03AF01, N03AN01                                                                                                                                                                                            |
| <b>Physical health problems</b>                                         |                                                                                                                                                                                                                                    |

|                                                            |                                                                                                                                                                                                   |
|------------------------------------------------------------|---------------------------------------------------------------------------------------------------------------------------------------------------------------------------------------------------|
| New cancer diagnosis                                       | An instance of a cancer diagnosis (ICD-10: C00-D48) occurring within 12 months before index date that is not a relapse (recoding) of a previous diagnosis made in the preceding 2 years           |
| <b>History of self-harm</b>                                |                                                                                                                                                                                                   |
| Any psychotropic medication overdose                       | Psychotropic medication overdose (ICD-10: X61, Y11) as the method of harm of the index event                                                                                                      |
| Cutting                                                    | Cutting (i.e. sharp object, ICD-10: X78 or Y28) as the method of harm of the index event                                                                                                          |
| Hanging, strangulation or suffocation                      | Hanging, strangulation or suffocation (ICD-10: X70 or Y20) as the method of harm of the index event                                                                                               |
| Drowning                                                   | Drowning or submersion (ICD-10: X71 or Y21) as the method of harm of the index event                                                                                                              |
| Lifetime history of self-harm prior to index*              | Any instance of self-harm occurring prior to the index date<br>ICD-10 codes: X60-X84, Y10-Y33<br>ICD-9 codes: E950-E959 and E980-E987<br>ICD-8 codes: E950-E959 and E980-E987                     |
| History of self-harm in the past 12 months prior to index* | Any instance of self-harm (ICD-10 codes: X60-X84, Y10-Y33) occurring within the 12 months before the index date                                                                                   |
| Number of lifetime prior self-harm episodes                | 1-2 episodes vs 3+                                                                                                                                                                                |
| Overnight admission                                        | Binary indicator of whether the index event resulted in an overnight hospital admission                                                                                                           |
| Time between episodes <= 1 month                           | Any instance of self-harm (ICD-10 codes: X60-X84, Y10-Y33) occurring within one month before the index date (for those with an additional self-harm episode, prior to the index date)             |
| <b>Mental health in the past 12 months</b>                 |                                                                                                                                                                                                   |
| Any psychiatric disorder except substance use disorders    | ICD-10: F00-F09, F20-F99 (Mental and behavioural disorders, excluding those due to psychoactive substance use)                                                                                    |
| Serious psychiatric disorder                               | ICD-10: F20-F29 (Schizophrenia, schizotypal and delusional disorders), F30-F31 (Mood [affective] disorders)                                                                                       |
| <b>Criminal/violence/legal issues</b>                      |                                                                                                                                                                                                   |
| Lifetime criminal record for any crime                     | Obtained from National Crime Register; individuals younger than 15 (the age of criminal responsibility) are excluded from the definitions below<br>Conviction for any crime before the index date |
| Criminal record for any crime in past 12 months            | Conviction for any crime within 12 months before the index date                                                                                                                                   |

|                                                        |                                                                                                                                                                                                                                                                           |
|--------------------------------------------------------|---------------------------------------------------------------------------------------------------------------------------------------------------------------------------------------------------------------------------------------------------------------------------|
| Lifetime arrest history for any crime                  | Arrest for any crime before the index date                                                                                                                                                                                                                                |
| Arrest history for any crime in past 12 months         | Arrest for any crime within 12 months before the index date                                                                                                                                                                                                               |
| Lifetime criminal record for violent crime             | Conviction for any of the following before the index date:<br>attempted/completed/aggravated forms of homicide,<br>manslaughter, unlawful threats, harassment, robbery, arson,<br>assault, assault on an official, kidnapping, stalking, coercion, all<br>sexual offences |
| Criminal record for violent crime in past 12 months    | Conviction for any violent crime, as listed above, within 12<br>months before the index date                                                                                                                                                                              |
| Lifetime arrest history for violent crime              | Arrest for any violent crime, as listed above before the index<br>date                                                                                                                                                                                                    |
| Arrest history for violent crime in the past 12 months | Arrest for any violent crime, as listed above, within 12 months<br>before the index date                                                                                                                                                                                  |
| <b>Family history</b>                                  |                                                                                                                                                                                                                                                                           |
| Family history of suicide                              | Death from suicide (ICD-10: X60-X84, Y10-Y33) of any parent,<br>sibling or child before the index date                                                                                                                                                                    |
| Family history of any psychiatric disorder             | Diagnosis of psychiatric disorder (ICD-10 F00-09, F20-F99) of<br>any parent, sibling or child before the index date                                                                                                                                                       |

Note: all variables except age were coded as binary variables. Those marked with an asterisk (\*) are core risk factors that were included in the final model irrespective of statistical significance.

ATC: Anatomical Therapeutic Chemical Classification System

ICD: International Statistical Classification of Diseases and Related Health Problems

LISA: Longitudinal integrated database for health insurance and labour market studies, <https://www.scb.se/lisa-en>

Supplementary Table 2: Deaths by suicide within the regions forming the development and validation samples (prevalence)

| Group 1                                       | Group 2                                         | Group 3                            | Group 4                                |
|-----------------------------------------------|-------------------------------------------------|------------------------------------|----------------------------------------|
| Major urban centres                           | Counties with major urban centres removed       | Counties with small population     | Counties with medium population        |
| Development sample                            |                                                 |                                    |                                        |
| Gothenburg<br>[18, 0.7%] {24, 0.9%}*          | Stockholm County Other<br>[51, 0.7%] {88, 1.2%} | Kronoberg<br>[13, 1.5%] {15, 1.7%} | Uppsala<br>[12, 0.6%] {15, 0.7%}       |
| Stockholm City North<br>[13, 0.7%] {21, 1.1%} | Skåne Other<br>[37, 0.8%] {55, 1.1%}            | Gotland<br>[2, 0.5%] {2, 0.5%}     | Södermanland<br>[6, 0.3%] {10, 0.5%}   |
| Stockholm City South<br>[24, 0.8%] {32, 1.1%} |                                                 | Blekinge<br>[8, 0.9%] {9, 1.1%}    | Jönköping<br>[11, 0.6%] {17, 0.9%}     |
|                                               |                                                 |                                    | Kalmar<br>[17, 1.3%] {24, 1.9%}        |
|                                               |                                                 |                                    | Örebro<br>[11, 0.8%] {15, 1.1%}        |
|                                               |                                                 |                                    | Dalarna<br>[12, 0.9%] {16, 1.2%}       |
|                                               |                                                 |                                    | Gävleborg<br>[7, 0.5%] {14, 1.0%}      |
|                                               |                                                 |                                    | Västernorrland<br>[8, 0.8%] {11, 1.1%} |
|                                               |                                                 |                                    | Västerbotten<br>[9, 0.7%] {10, 0.8%}   |
|                                               |                                                 |                                    | Norrbotten<br>[8, 0.5%] {13, 0.8%}     |
| External validation sample                    |                                                 |                                    |                                        |
| Malmö<br>[9, 0.6%] {25, 1.7%}                 | Västra Götaland Other<br>[39, 0.7%] {50, 0.9%}  | Jämtland<br>[4, 0.8%] {6, 1.2%}    | Östergötland<br>[14, 0.5%] {24, 0.9%}  |
|                                               |                                                 |                                    | Halland<br>[7, 0.5%] {11, 0.7%}        |
|                                               |                                                 |                                    | Värmland<br>[18, 1.1%] {33, 2.0%}      |
|                                               |                                                 |                                    | Västmanland<br>[17, 0.8%] {29, 1.4%}   |

\* [Within 6 months] {Within 12 months}

Supplementary Figure 1: Non-linear effect of age, shown for the hazard function

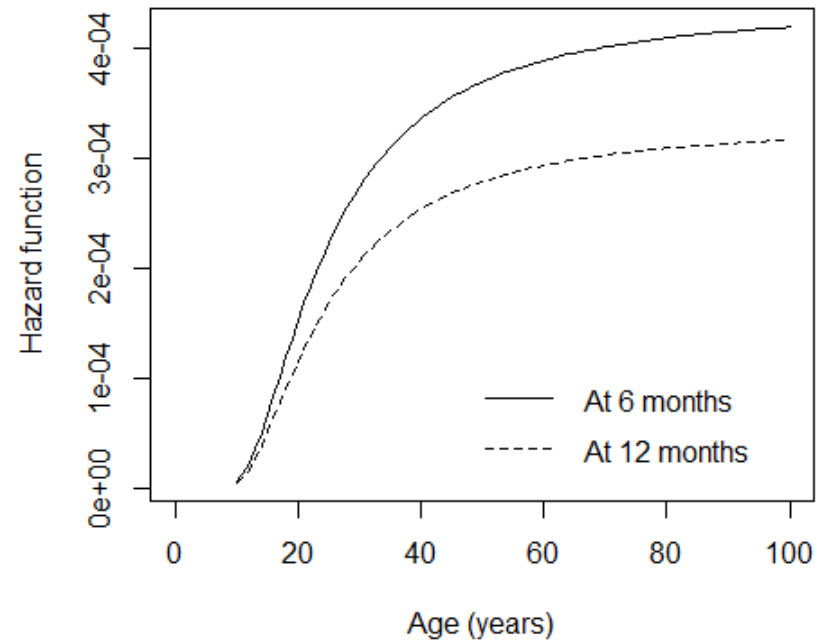

Supplementary Table 3: Parameters (and their 95% confidence intervals) to calculate predicted risk of death by suicide within 6 and 12 months after an emergency treatment for self-harm

|                                                                            | Parameter ( $\beta$ ) | 95% confidence interval |       |
|----------------------------------------------------------------------------|-----------------------|-------------------------|-------|
| <b>General demographics</b>                                                |                       |                         |       |
| (Age at index/10) <sup>-2*</sup>                                           | -4.20                 | -5.32                   | -3.08 |
| Sex, female*                                                               | -0.70                 | -0.87                   | -0.53 |
| <b>Substance misuse</b>                                                    |                       |                         |       |
| Current or lifetime alcohol use disorder (excluding alcohol intoxication)* | -0.03                 | -0.22                   | 0.17  |
| Current or lifetime drug use disorder (including drug intoxication)*       | 0.31                  | 0.12                    | 0.50  |
| <b>Treatment in the past three months</b>                                  |                       |                         |       |
| Any psychotropic medication                                                | 0.76                  | 0.52                    | 1.01  |
| <b>History of self-harm</b>                                                |                       |                         |       |
| Any psychotropic medication overdose                                       | 0.42                  | 0.02                    | 0.82  |
| Hanging, strangulation or suffocation                                      | 0.97                  | 0.35                    | 1.59  |
| Lifetime history of self-harm prior to index*                              | 0.15                  | -0.06                   | 0.36  |
| History of self-harm in the past 12 months prior to index, 1+ vs none*     | 0.31                  | 0.07                    | 0.55  |
| Overnight admission                                                        | 0.57                  | 0.38                    | 0.75  |
| <b>Mental health in the past 12 months</b>                                 |                       |                         |       |
| Any psychiatric disorder except substance use disorders                    | 0.51                  | 0.31                    | 0.70  |
| <b>Other parameters in the model</b>                                       |                       |                         |       |
| Intercept                                                                  | -6.49                 | -6.79                   | -6.20 |
| Shape parameter                                                            | 0.60                  | 0.55                    | 0.65  |

\*Core factors

The formula to calculate the risk of death by suicide within  $t$  months after an emergency treatment for self-harm is:  $\Pr(\text{suicide within } t \text{ months}) = 1 - \exp(-\exp(\text{linpred}_{\text{sui}})t^{0.595})$

where  $\text{linpred}_{\text{sui}} = -6.49 + \sum \beta * \text{Risk Factor}$  and  $t = 6$  or  $12$ .

The baseline survivor function is given by  $S_0(t) = \exp(-0.0015 * t^{0.595})$ . At 6 and 12 months this is  $S_0(6) = 0.996$  and  $S_0(12) = 0.993$ , respectively.

Binary risk factors are coded as 1 if present and 0 if absent.

Supplementary Table 4: Unadjusted associations between candidate predictors and outcome in the development sample

|                                                                                       | Hazard Ratio | 95% CI for the hazard ratio |      | p-value | Weibull shape parameter | 95% CI for the Weibull shape parameter |        |
|---------------------------------------------------------------------------------------|--------------|-----------------------------|------|---------|-------------------------|----------------------------------------|--------|
| <b>General demographics</b>                                                           |              |                             |      |         |                         |                                        |        |
| Age (years) <sup>1</sup>                                                              | 1.02         | 1.02                        | 1.03 | <0.001  | 0.5948                  | 0.5472                                 | 0.6465 |
| Female <sup>1</sup>                                                                   | 0.55         | 0.46                        | 0.65 | <0.001  | 0.5909                  | 0.5435                                 | 0.6424 |
| <b>Substance misuse</b>                                                               |              |                             |      |         |                         |                                        |        |
| Current or lifetime alcohol use disorder, excluding alcohol intoxication <sup>1</sup> | 2.04         | 1.70                        | 2.44 | <0.001  | 0.5906                  | 0.5432                                 | 0.6421 |
| Current or lifetime drug use disorder (including drug intoxication) <sup>1</sup>      | 2.36         | 1.99                        | 2.81 | <0.001  | 0.5908                  | 0.5435                                 | 0.6424 |
| Alcohol intoxication at index                                                         | 0.77         | 0.47                        | 1.26 | 0.298   | 0.5901                  | 0.5428                                 | 0.6416 |
| <b>Living status</b>                                                                  |              |                             |      |         |                         |                                        |        |
| Living with other adult                                                               | 0.64         | 0.53                        | 0.77 | <0.001  | 0.5898                  | 0.5424                                 | 0.6412 |
| Living with children                                                                  | 0.55         | 0.46                        | 0.66 | <0.001  | 0.5903                  | 0.5429                                 | 0.6418 |
| <b>Treatment in the past three months</b>                                             |              |                             |      |         |                         |                                        |        |
| Any psychotropic medication                                                           | 3.97         | 3.17                        | 4.97 | <0.001  | 0.5923                  | 0.5448                                 | 0.6439 |
| Antidepressant treatment                                                              | 2.17         | 1.83                        | 2.57 | <0.001  | 0.5907                  | 0.5433                                 | 0.6422 |
| Antipsychotic treatment                                                               | 2.30         | 1.88                        | 2.81 | <0.001  | 0.5908                  | 0.5434                                 | 0.6423 |
| Mood stabilizer treatment                                                             | 2.10         | 1.35                        | 3.29 | 0.001   | 0.5901                  | 0.5428                                 | 0.6416 |
| <b>Physical health problems</b>                                                       |              |                             |      |         |                         |                                        |        |
| New cancer diagnosis                                                                  | 1.18         | 0.56                        | 2.49 | 0.664   | 0.5901                  | 0.5427                                 | 0.6415 |
| <b>History of self-harm</b>                                                           |              |                             |      |         |                         |                                        |        |
| Method of self-harm at index                                                          |              |                             |      |         |                         |                                        |        |
| Any psychotropic medication overdose                                                  | 1.33         | 0.90                        | 1.98 | 0.153   | 0.5900                  | 0.5427                                 | 0.6415 |
| Cutting as a method of harm                                                           | 0.54         | 0.39                        | 0.74 | <0.001  | 0.5901                  | 0.5428                                 | 0.6416 |
| Hanging, strangulation or suffocation                                                 | 2.30         | 1.23                        | 4.30 | 0.009   | 0.5901                  | 0.5428                                 | 0.6416 |
| Lifetime history of self-harm prior to index <sup>1</sup>                             | 2.15         | 1.82                        | 2.55 | <0.001  | 0.5901                  | 0.5427                                 | 0.6415 |
| History of self-harm in the past 12 months prior to index <sup>1</sup>                | 2.21         | 1.81                        | 2.71 | <0.001  | 0.5902                  | 0.5429                                 | 0.6417 |

|                                                              |      |      |      |        |        |        |        |
|--------------------------------------------------------------|------|------|------|--------|--------|--------|--------|
| Number of lifetime prior self-harm episodes, >1 vs exactly 1 | 2.17 | 1.80 | 2.61 | <0.001 | 0.5904 | 0.5430 | 0.6419 |
| Overnight admission                                          | 2.26 | 1.89 | 2.69 | <0.001 | 0.5903 | 0.5430 | 0.6418 |
| Time between lifetime episodes, <=1 vs >1 month              | 1.99 | 1.50 | 2.65 | <0.001 | 0.5909 | 0.5436 | 0.6424 |
| <b>Mental health in the past 12 months</b>                   |      |      |      |        |        |        |        |
| Any psychiatric disorder except substance use disorders      | 2.53 | 2.12 | 3.03 | <0.001 | 0.5903 | 0.5430 | 0.6418 |
| Serious psychiatric disorder                                 | 1.81 | 1.42 | 2.32 | <0.001 | 0.5907 | 0.5433 | 0.6422 |
| <b>Criminal/violence/legal issues</b>                        |      |      |      |        |        |        |        |
| Lifetime criminal record for any crime                       | 2.01 | 1.70 | 2.38 | <0.001 | 0.5903 | 0.5429 | 0.6418 |
| Criminal record for any crime in past 12 months              | 1.48 | 1.16 | 1.88 | 0.002  | 0.5904 | 0.5431 | 0.6419 |
| Lifetime arrest history for any crime                        | 1.64 | 1.39 | 1.95 | <0.001 | 0.5901 | 0.5428 | 0.6416 |
| Arrest history for any crime in past 12 months               | 1.49 | 1.22 | 1.82 | <0.001 | 0.5902 | 0.5428 | 0.6416 |
| Lifetime criminal record for violent crime                   | 1.43 | 1.16 | 1.76 | 0.001  | 0.5901 | 0.5428 | 0.6416 |
| Criminal record for violent crime in past 12 months          | 1.16 | 0.70 | 1.94 | 0.564  | 0.5902 | 0.5428 | 0.6417 |
| Lifetime arrest history for violent crime                    | 1.52 | 1.23 | 1.87 | <0.001 | 0.5901 | 0.5427 | 0.6415 |
| Arrest history for violent crime in the past 12 months       | 1.62 | 1.21 | 2.18 | 0.001  | 0.5903 | 0.5430 | 0.6418 |
| <b>Family history</b>                                        |      |      |      |        |        |        |        |
| Family history of suicide                                    | 1.52 | 1.01 | 2.29 | 0.045  | 0.5902 | 0.5428 | 0.6416 |
| Family history of any psychiatric disorder                   | 1.06 | 0.89 | 1.25 | 0.538  | 0.5901 | 0.5428 | 0.6416 |

<sup>1</sup>Core factor, kept in the final model independently of its statistical significance or predictive strength; Univariate association between drowning as a method of index self-harm and suicide was not assessed because none of the individual who died by suicide use drowning at index.



Supplementary Table 5: Risk factors (and their hazard ratios and 95% confidence intervals) in the final multivariate model to predict risk of death by suicide after an emergency treatment for self-harm, when criminal history variables are considered (Crime model).

|                                                                            | Hazard Ratio | 95% confidence interval |        | p-value |
|----------------------------------------------------------------------------|--------------|-------------------------|--------|---------|
| <b>General demographics</b>                                                |              |                         |        |         |
| (Age at index/10) <sup>-2*</sup>                                           | 0.016        | 0.005                   | 0.049  | <0.001  |
| Sex, Female*                                                               | 0.51         | 0.42                    | 0.61   | <0.001  |
| <b>Substance misuse</b>                                                    |              |                         |        |         |
| Current or lifetime alcohol use disorder (excluding alcohol intoxication)* | 0.95         | 0.78                    | 1.15   | 0.578   |
| Current or lifetime drug use disorder (including drug intoxication)*       | 1.34         | 1.11                    | 1.63   | 0.003   |
| <b>History of self-harm</b>                                                |              |                         |        |         |
| Any psychotropic medication overdose                                       | 1.52         | 1.02                    | 2.26   | 0.039   |
| Hanging, strangulation or suffocation                                      | 2.66         | 1.43                    | 4.93   | 0.002   |
| Lifetime history of self-harm prior to index*                              | 1.16         | 0.94                    | 1.43   | 0.168   |
| History of self-harm in the past 12 months prior to index, 1+ vs none*     | 1.36         | 1.07                    | 1.73   | 0.012   |
| Overnight admissions                                                       | 1.76         | 1.46                    | 2.11   | <0.001  |
| <b>Mental health in the past 12 months</b>                                 |              |                         |        |         |
| Any psychiatric disorder except substance use disorders                    | 1.66         | 1.37                    | 2.01   | <0.001  |
| <b>Treatment in the past three months</b>                                  |              |                         |        |         |
| Any psychotropic medication                                                | 2.13         | 1.67                    | 2.72   | <0.001  |
| <b>Criminal history</b>                                                    |              |                         |        |         |
| Lifetime criminal record for violent crime prior to index                  | 0.70         | 0.55                    | 0.88   | 0.003   |
| Lifetime criminal record for any crime prior to index                      | 1.41         | 1.15                    | 1.72   | 0.001   |
| Exp(Intercept)                                                             | 0.0014       | 0.0010                  | 0.0019 | <0.001  |
| Shape parameter                                                            | 0.5952       | 0.5477                  | 0.6470 | <0.001  |

\*Core factor; baseline survivor function at time  $t$ ,  $S_0(t) = 0.0006t^{-0.4048}$ .

Supplementary Table 6: Internal discrimination performance

|                    | Apparent             |                      |                      | Adjusted for optimism |                      |                      |
|--------------------|----------------------|----------------------|----------------------|-----------------------|----------------------|----------------------|
|                    | Overall              | 6 months             | 12 months            | Overall               | 6 months             | 12 months            |
|                    | Statistic (95% CI)   | Statistic (95% CI)   | Statistic (95% CI)   | Statistic (95% CI)    | Statistic (95% CI)   | Statistic (95% CI)   |
| <b>Final model</b> |                      |                      |                      |                       |                      |                      |
| <b>Harrell's c</b> | 0.76<br>(0.74, 0.77) | 0.77<br>(0.74, 0.79) | 0.76<br>(0.75, 0.78) | 0.76<br>(0.73, 0.78)  | 0.77<br>(0.73, 0.80) | 0.76<br>(0.74, 0.79) |
| <b>Somers' D</b>   | 0.52<br>(0.48, 0.55) | 0.53<br>(0.48, 0.58) | 0.53<br>(0.49, 0.57) | 0.51<br>(0.47, 0.56)  | 0.53<br>(0.47, 0.60) | 0.53<br>(0.48, 0.58) |
| <b>Crime model</b> |                      |                      |                      |                       |                      |                      |
| <b>Harrell's c</b> | 0.76<br>(0.74, 0.78) | 0.77<br>(0.74, 0.79) | 0.77<br>(0.75, 0.79) | 0.76<br>(0.74, 0.78)  | 0.77<br>(0.73, 0.80) | 0.77<br>(0.74, 0.79) |
| <b>Somers' D</b>   | 0.52<br>(0.49, 0.55) | 0.53<br>(0.49, 0.58) | 0.53<br>(0.49, 0.57) | 0.52<br>(0.47, 0.57)  | 0.53<br>(0.47, 0.60) | 0.53<br>(0.48, 0.59) |

Supplementary Figure 2: ROC curves in the development sample

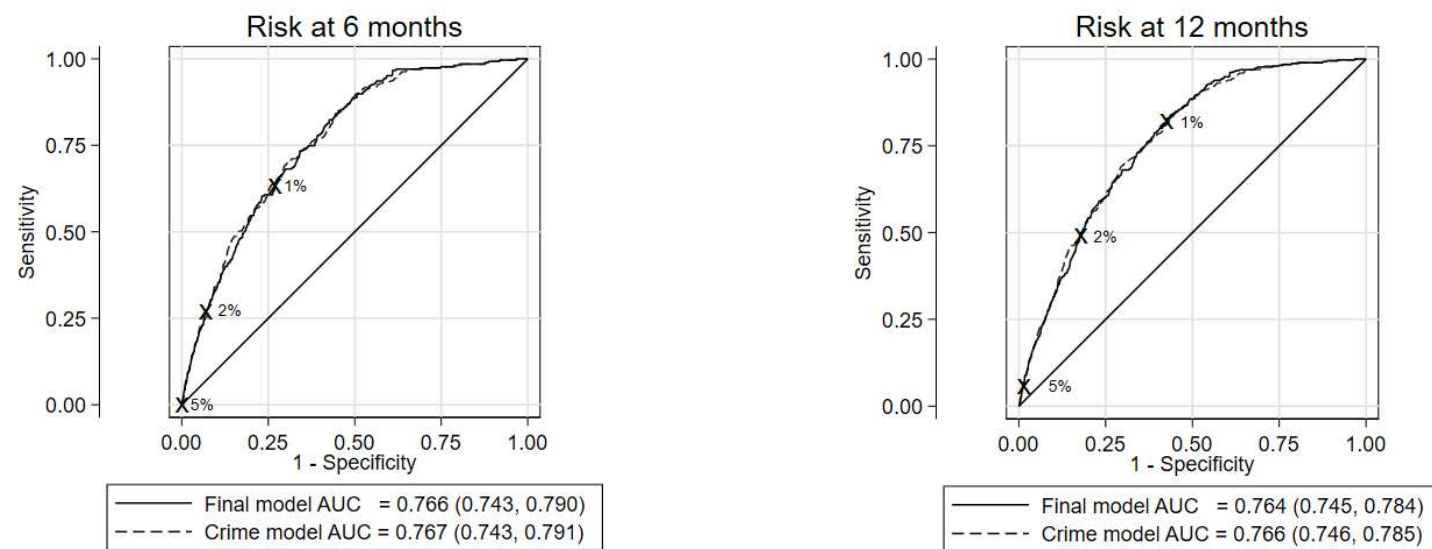

AUC = Area under the ROC curve; values are AUC and 95% confidence intervals; probability risk cut-points considered are shown (i.e. 1%, 2%, 5%).

Supplementary Figure 3: Internal calibration plots

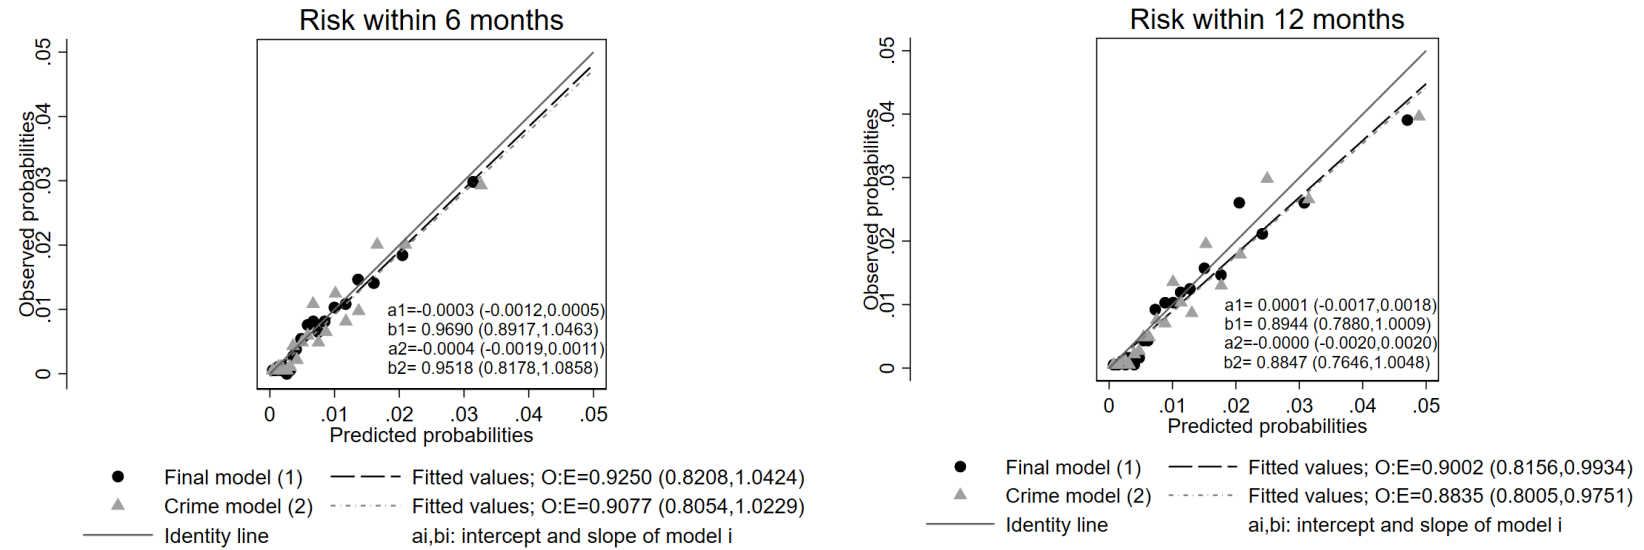

O:E = Observed to expected ratio; overall Brier score was 0.014 (95%CI 0.013 to 0.015) for both models.

Supplementary Table 7: Classification measures (and 95% confidence intervals) for the final model in the development sample

| Thresholds         | Risk at 6 months<br>Prevalence = 0.7% (0.6, 0.8) |                    |                    | Risk at 12 months<br>Prevalence =1.0% (0.9, 1.2) |                    |                    |
|--------------------|--------------------------------------------------|--------------------|--------------------|--------------------------------------------------|--------------------|--------------------|
|                    | 1%                                               | 2%                 | 5%                 | 1%                                               | 2%                 | 5%                 |
| <b>Sensitivity</b> | 64.4% (58.4, 70.2)                               | 27.7% (22.4, 33.5) | 0.4% (0.01, 2.2)   | 82.9% (78.8, 86.5)                               | 49.9% (44.8, 54.9) | 6.7% (4.4, 9.6)    |
| <b>Specificity</b> | 71.6% (71.1, 72.0)                               | 90.8% (90.5, 91.1) | 98.1% (98.0, 98.3) | 56.4% (55.9, 56.9)                               | 80.6% (80.2, 81.0) | 96.7% (96.6, 96.9) |
| <b>PPV</b>         | 1.6% (1.4, 1.9)                                  | 2.1% (1.7, 2.6)    | 0.1% (0.004, 0.8)  | 2.0% (1.8, 2.2)                                  | 2.6% (2.3, 3.0)    | 2.1% (1.4, 3.1)    |
| <b>NPV</b>         | 99.6% (99.6, 99.7)                               | 99.4% (99.3, 99.5) | 99.3% (99.2, 99.4) | 99.7% (99.6, 99.8)                               | 99.3% (99.3, 99.4) | 99.0% (98.9, 99.1) |

PPV = Positive predictive value; NPV = Negative predicted value

Supplementary Table 8: Classification measures (and 95% confidence intervals) for the final model evaluated in the external validation sample

| Thresholds         | Risk at 6 months<br>Prevalence = 0.7% (0.6, 0.8) |                    |                    | Risk at 12 months<br>Prevalence =1.1% (1.0, 1.3) |                    |                    |
|--------------------|--------------------------------------------------|--------------------|--------------------|--------------------------------------------------|--------------------|--------------------|
|                    | 1%                                               | 2%                 | 5%                 | 1%                                               | 2%                 | 5%                 |
| <b>Sensitivity</b> | 68% (58, 76)                                     | 24% (16, 33)       | 1% (0, 5)          | 82% (75, 87)                                     | 43% (35, 50)       | 7% (4, 12)         |
| <b>Specificity</b> | 71% (70, 72)                                     | 92% (92, 93)       | 99.9% (99.8, 99.9) | 54% (53, 55)                                     | 81% (79.9, 81.1)   | 98.3% (98.1, 98.5) |
| <b>PPV</b>         | 2% (1, 2)                                        | 2% (1, 3)          | 5% (0.1, 23)       | 2% (1.7, 2.4)                                    | 2.5% (2, 3)        | 4% (2, 8)          |
| <b>NPV</b>         | 99.7% (99.6, 99.8)                               | 99.4% (99.3, 99.5) | 99.3% (99.2, 99.4) | 99.6% (99.4, 99.7)                               | 99.2% (99.0, 99.3) | 98.9% (98.7, 99.1) |

PPV = Positive predictive value; NPV = Negative predictive value

## TRIPOD Checklist: Prediction Model Development and Validation(34)

| Section/Topic                | Checklist Item |     |                                                                                                                                                                                                  | Page            |
|------------------------------|----------------|-----|--------------------------------------------------------------------------------------------------------------------------------------------------------------------------------------------------|-----------------|
| <b>Title and abstract</b>    |                |     |                                                                                                                                                                                                  |                 |
| Title                        | 1              | D;V | Identify the study as developing and/or validating a multivariable prediction model, the target population, and the outcome to be predicted.                                                     | 1               |
| Abstract                     | 2              | D;V | Provide a summary of objectives, study design, setting, participants, sample size, predictors, outcome, statistical analysis, results, and conclusions.                                          | 2               |
| <b>Introduction</b>          |                |     |                                                                                                                                                                                                  |                 |
| Background and objectives    | 3a             | D;V | Explain the medical context (including whether diagnostic or prognostic) and rationale for developing or validating the multivariable prediction model, including references to existing models. | 4               |
|                              | 3b             | D;V | Specify the objectives, including whether the study describes the development or validation of the model or both.                                                                                | 4               |
| <b>Methods</b>               |                |     |                                                                                                                                                                                                  |                 |
| Source of data               | 4a             | D;V | Describe the study design or source of data (e.g., randomized trial, cohort, or registry data), separately for the development and validation data sets, if applicable.                          | 5 & 7           |
|                              | 4b             | D;V | Specify the key study dates, including start of accrual; end of accrual; and, if applicable, end of follow-up.                                                                                   | 5               |
| Participants                 | 5a             | D;V | Specify key elements of the study setting (e.g., primary care, secondary care, general population) including number and location of centres.                                                     | 5               |
|                              | 5b             | D;V | Describe eligibility criteria for participants.                                                                                                                                                  | 5               |
|                              | 5c             | D;V | Give details of treatments received, if relevant.                                                                                                                                                | NA              |
| Outcome                      | 6a             | D;V | Clearly define the outcome that is predicted by the prediction model, including how and when assessed.                                                                                           | 5               |
|                              | 6b             | D;V | Report any actions to blind assessment of the outcome to be predicted.                                                                                                                           | NA              |
| Predictors                   | 7a             | D;V | Clearly define all predictors used in developing or validating the multivariable prediction model, including how and when they were measured.                                                    | 6 & Supp.T ab.1 |
|                              | 7b             | D;V | Report any actions to blind assessment of predictors for the outcome and other predictors.                                                                                                       | 6               |
| Sample size                  | 8              | D;V | Explain how the study size was arrived at.                                                                                                                                                       | 6 & 8           |
| Missing data                 | 9              | D;V | Describe how missing data were handled (e.g., complete-case analysis, single imputation, multiple imputation) with details of any imputation method.                                             | 6 & NB of Tab 1 |
| Statistical analysis methods | 10a            | D   | Describe how predictors were handled in the analyses.                                                                                                                                            | 6               |
|                              | 10b            | D   | Specify type of model, all model-building procedures (including any predictor selection), and method for internal validation.                                                                    | 6               |
|                              | 10c            | V   | For validation, describe how the predictions were calculated.                                                                                                                                    | 8               |
|                              | 10d            | D;V | Specify all measures used to assess model performance and, if relevant, to compare multiple models.                                                                                              | 7-8             |
|                              | 10e            | V   | Describe any model updating (e.g., recalibration) arising from the validation, if done.                                                                                                          | NA              |
| Risk groups                  | 11             | D;V | Provide details on how risk groups were created, if done.                                                                                                                                        | 7               |
| Development vs. validation   | 12             | V   | For validation, identify any differences from the development data in setting, eligibility criteria, outcome, and predictors.                                                                    | 7-8             |

| Results                   |    |     |                                                                                                                                                                                                       |                         |
|---------------------------|----|-----|-------------------------------------------------------------------------------------------------------------------------------------------------------------------------------------------------------|-------------------------|
| Participants              | 3a | D;V | Describe the flow of participants through the study, including the number of participants with and without the outcome and, if applicable, a summary of the follow-up time. A diagram may be helpful. | 8                       |
|                           | 3b | D;V | Describe the characteristics of the participants (basic demographics, clinical features, available predictors), including the number of participants with missing data for predictors and outcome.    | 10 & Tab 1              |
|                           | 3c | V   | For validation, show a comparison with the development data of the distribution of important variables (demographics, predictors and outcome).                                                        | 10 & Tab 1              |
| Model development         | 4a | D   | Specify the number of participants and outcome events in each analysis.                                                                                                                               | 8                       |
|                           | 4b | D   | If done, report the unadjusted association between each candidate predictor and outcome.                                                                                                              | Supp. Tab. 4, p.7       |
| Model specification       | 5a | D   | Present the full prediction model to allow predictions for individuals (i.e., all regression coefficients, and model intercept or baseline survival at a given time point).                           | Supp. Tab. 3, p.6       |
|                           | 5b | D   | Explain how to use the prediction model.                                                                                                                                                              | Supp. p. 6              |
| Model performance         | 16 | D;V | Report performance measures (with CIs) for the prediction model.                                                                                                                                      | 11-12 & Supp., p. 10-13 |
| Model-updating            | 17 | V   | If done, report the results from any model updating (i.e., model specification, model performance).                                                                                                   | NA                      |
| Discussion                |    |     |                                                                                                                                                                                                       |                         |
| Limitations               | 18 | D;V | Discuss any limitations of the study (such as nonrepresentative sample, few events per predictor, missing data).                                                                                      | 14                      |
| Interpretation            | 9a | V   | For validation, discuss the results with reference to performance in the development data, and any other validation data.                                                                             | 12-13                   |
|                           | 9b | D;V | Give an overall interpretation of the results, considering objectives, limitations, results from similar studies, and other relevant evidence.                                                        | 15                      |
| Implications              | 20 | D;V | Discuss the potential clinical use of the model and implications for future research.                                                                                                                 | 15                      |
| Other information         |    |     |                                                                                                                                                                                                       |                         |
| Supplementary information | 21 | D;V | Provide information about the availability of supplementary resources, such as study protocol, Web calculator, and data sets.                                                                         | 7-11, 14, 16            |
| Funding                   | 22 | D;V | Give the source of funding and the role of the funders for the present study.                                                                                                                         | 1                       |

\*Items relevant only to the development of a prediction model are denoted by D, items relating solely to a validation of a prediction model are denoted by V, and items relating to both are denoted D;V.
